# Supplementary material for: Astrocyte-Derived TNF-α Activated Platelets Promote Cerebral Ischemia/Reperfusion Injury by Regulating RIP1/RIP3/AKT Signaling Pathway
Source: Research Square preprint supplement (doi:10.21203/rs.3.rs-849954/v1), 2021-09-02
Supplement: Supplementary file 1 [file e5f78d2ca066dd90cf796e7e.xlsx]

## Sheet: Sheet1
Gene_Name	Primer_Sequence	Gene_Name	Primer_Sequence
M-Dnajb1 for qpcr F	CTGAGTTCTTCGGTGGCAGA	M-Cyr61 for qpcr F	CAGTGCTGTGAAGAGTGGGT
M-Dnajb1 for qpcr R	AAGCCACCCATACCCATTGG	M-Cyr61 for qpcr R	GCCAAAGACAGGAAGCCTCT
M-Gadd45g for qpcr F	GAGTCCGCCAAAGTCCTGAA	M-Chac1 for qpcr F	GCCCTGTGGATTTTCGGGTA
M-Gadd45g for qpcr R	CGTGAAATGGATCTGCAGCG	M-Chac1 for qpcr R	CGGTCTTCAAGGAGGGTCAC
M-Egr1 for qpcr F	CCACCTTACCACCCACATCC	M-Cd14 for qpcr F	ATTCTATTCGGAGCCCTGCG
M-Egr1 for qpcr R	TAGCCACTGGGGATGGGTAA	M-Cd14 for qpcr R	ACGTTGCGGAGGTTCAAGAT
M-Ppp1r15a for qpcr F	AGGCGGCTCAGATTGTTCAA	M-Thbs1 for qpcr F	CATGCCATGGCCAACAAACA
M-Ppp1r15a for qpcr R	TCGATCTCGTGCAAACTGCT	M-Thbs1 for qpcr R	TTGCACTCACAGCGGTACAT
M-Rn7sk for qpcr F	AGGACGACCTTCCCCGAATA	M-Kdelr3 for qpcr F	ACAGTTACACGCCGATGGAG
M-Rn7sk for qpcr R	GCGCCTCATTTGGATGTGTC	M-Kdelr3 for qpcr R	GTTGGCCAGATAGAGGAGCC
M-Hspb1 for qpcr F	TCACCCGGAAATACACGCTC	M-Ccl4 for qpcr F	CCTCCCACTTCCTGCTGTTT
M-Hspb1 for qpcr R	GGCCTCGAAAGTAACCGGAA	M-Ccl4 for qpcr R	GCTCACTGGGGTTAGCACAG
M-Cckbr for qpcr F	TCCTACTCTCCCTGGCAGTC	M-Tnfaip6 for qpcr F	AATCCGGCTCAACAGGAGTG
M-Cckbr for qpcr R	GCCGCGAGATTTAGAGTGGA	M-Tnfaip6 for qpcr R	GGGAAGCCCGGGGATTTAAA
M-Rgs2 for qpcr F	ACTGCGTACCCATGGACAAG	M-Tnf for qpcr F	CACAGAAAGCATGATCCGCG
M-Rgs2 for qpcr R	CTGCGCTTCCTCAGGAGAAG	M-Tnffor qpcr R	CGATCACCCCGAAGTTCAGT
M-Ier2 for qpcr F	GAGCCCATGGATACGCAAGA	M-Fosb for qpcr F	ATCTTCAGTGGCTCGTGCAA
M-Ier2 for qpcr R	ACCTCTTCTAGACGGGCCTT	M-Fosb for qpcr R	GTAGCTGGTTCCTGGCATGT
M-Btg2 for qpcr F	AAGAGAACCGACATGCTCCC	M-Jun for qpcr F	TGGGCACATCACCACTACAC
M-Btg2 for qpcr R	GAGCGCCCTACTGAAAACCT	M-Jun for qpcr R	GGGAAGCGTGTTCTGGCTAT
M-Gpr3 for qpcr F	ATGTGGTGCTGTGCATCTCA	M-Jund for qpcr F	GACACGCAAGAACGCATCAA
M-Gpr3 for qpcr R	TGGTGAGCCAATGCAGAAGT	M-Jund for qpcr R	ACTTTCTGTTTGAGCTGCGC
M-Phlda1 for qpcr F	GAACCGTCCCAACCTAGTGG	M-Fos for qpcr F	TACTACCATTCCCCAGCCGA
M-Phlda1 for qpcr R	TCTTTGCCCTCCGTCATCAC	M-Fos for qpcr R	GCTGTCACCGTGGGGATAAA
M-Sertad1 for qpcr F	GACTGGAGGGCCTGTTTGAG	M-Junb for qpcr F	CTGGCAGCCTGTCTCTACAC
M-Sertad1 for qpcr R	CAACTCCGCCTCATCCAACT	M-Junb for qpcr R	GACCCGAAAAGTAGCTGCCT
M-Gapdh for qpcr F	CCACAGTCCATGCCATCACT
M-Gapdh for qpcr R	GACGGACACATTGGGGGTAG
